# Supplementary material for: Low Bifidobacterium Abundance in the Lower Gut Microbiota Is Associated With Helicobacter pylori-Related Gastric Ulcer and Gastric Cancer
Source: PubMed Central journal article supplement (PMC7953064; doi:10.3389/fmicb.2021.631140), 2021-02-26
Supplement: Data_Sheet_1.pdf [file Data_Sheet_1.pdf]

## Supplementary Material

### Supplementary Figures

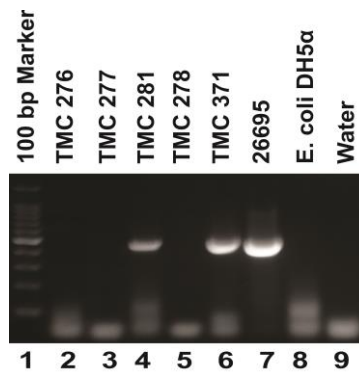

**Figure S1.** PCR for the amplification of the of *H. pylori ureB* gene that encodes the urease enzyme. The metagenomics DNA extracted from the gastric biopsies were used for the *ureB* PCR for the presence of *H. pylori* in biopsy samples.

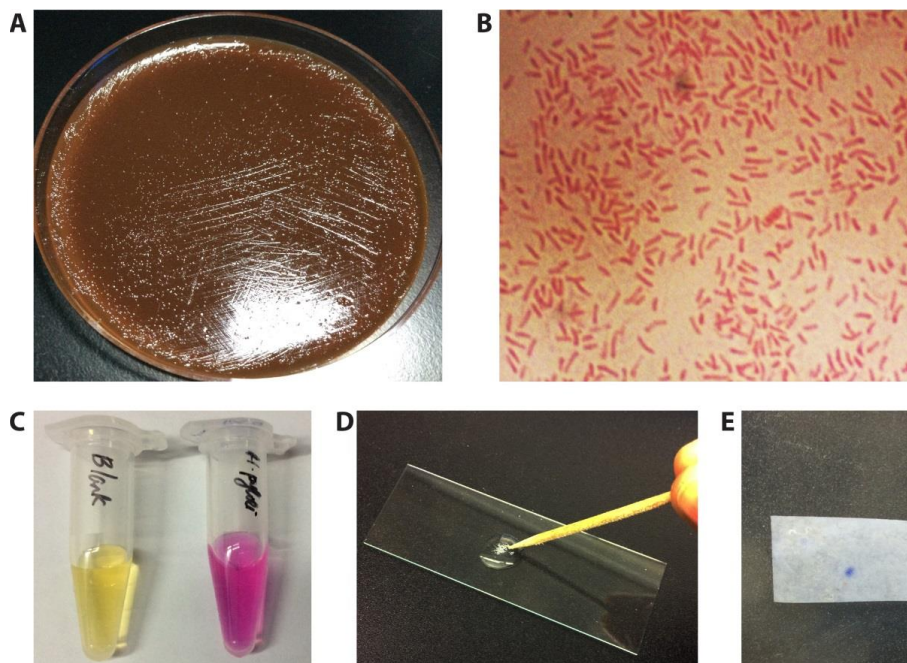

**Figure S2.** (A) *H. pylori* colonies grown on BHI-agar plate supplemented with sheep blood. The colonies look small and transparent like water droplets. (B) *H. pylori* visualized under microscope (1000X) after Gram staining. The Gram negative curved bacilli were visible. (C) Positive urease test (pink) for *H. pylori*. (D) Positive catalase test (bubbles) for *H. pylori*. (E) Positive oxidase test (purple color) for *H. pylori*.

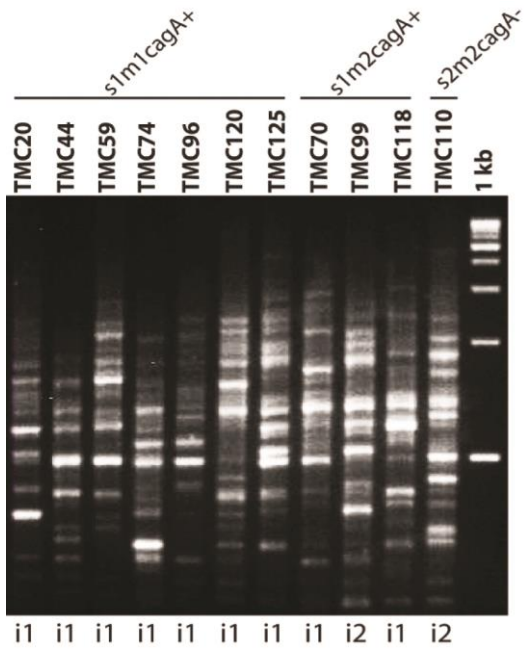

**Figure S3.** DNA fingerprinting analysis using randomly amplified polymorphic DNA (RAPD)-PCR for 11 representative *H. pylori* strains with different genotypes. Seven of them were *vacAs1i1m1cagA+*, 2 of them were *vacAs1i1m2cagA+*, 1 of them was *vacAs1i2m2cagA+* and 1 of them was *vacAs2m2cagA-*. Each strain has unique RAPD pattern.

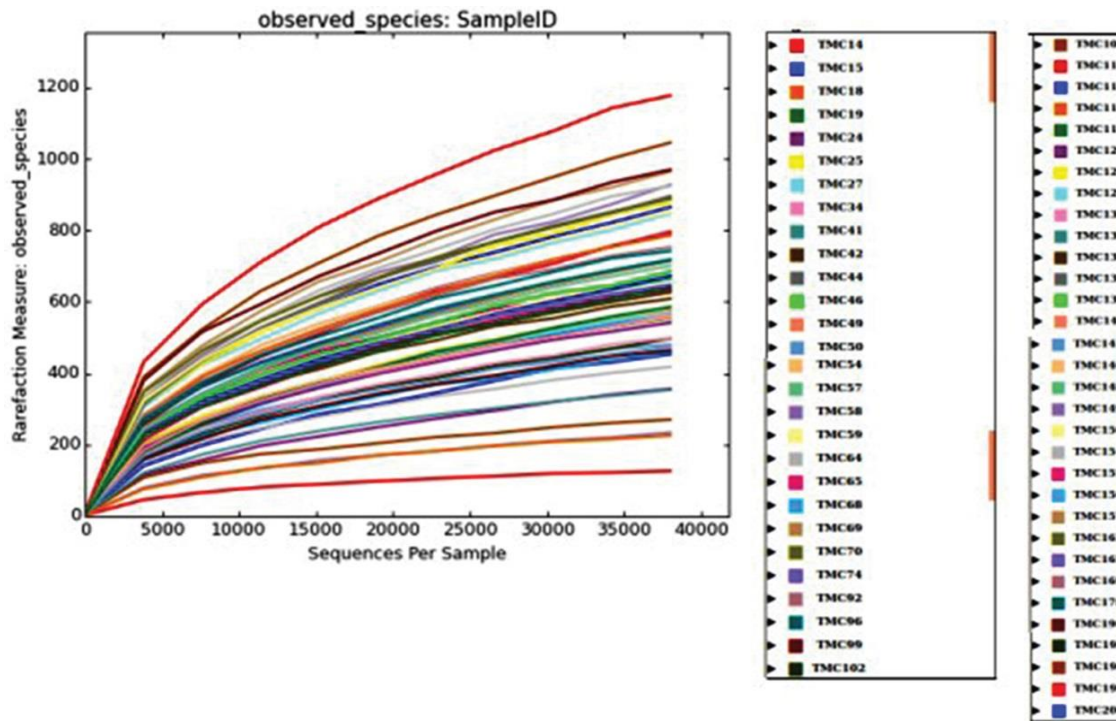

**Figure S4.** Rarefaction curve of the NGS data obtained from sequencing the V3-V4 region of the 16S rRNA genes of the bacteria present in the stool of Trivandrum residents.

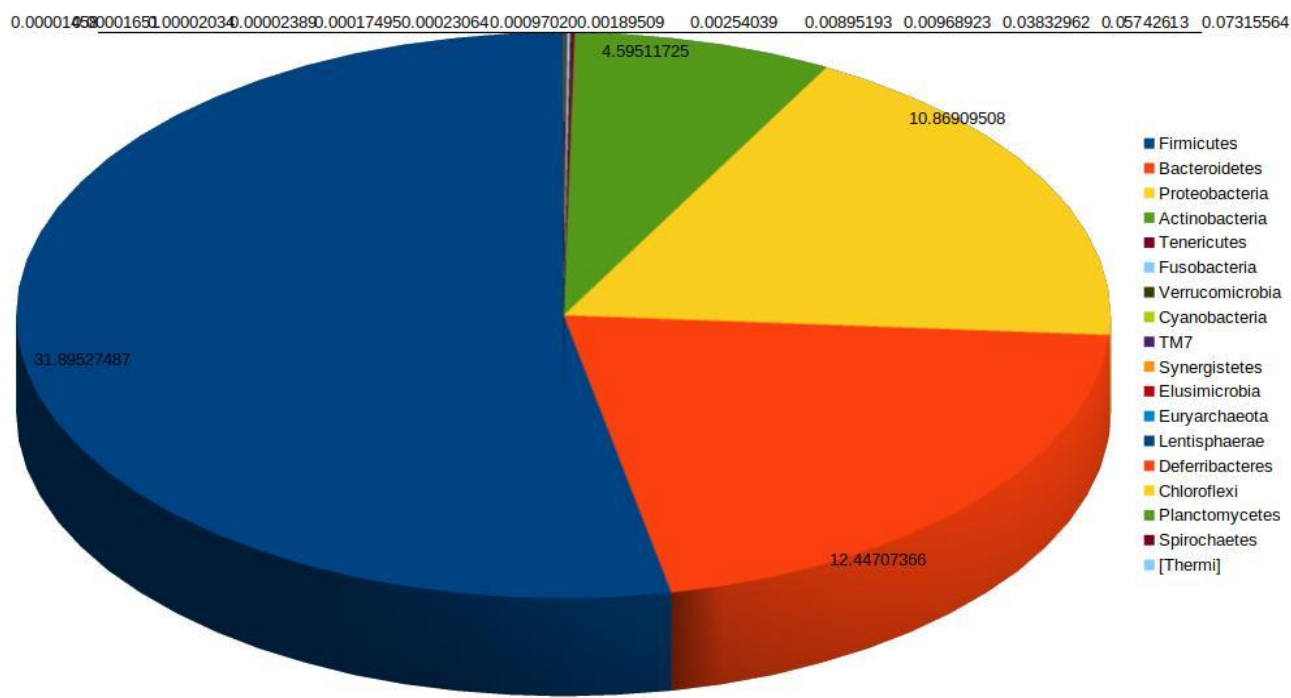

**Figure S5.** Pie chart showing the relative abundances of different bacterial phyla in the gut microbiota of the Trivandrum residents (N=60).

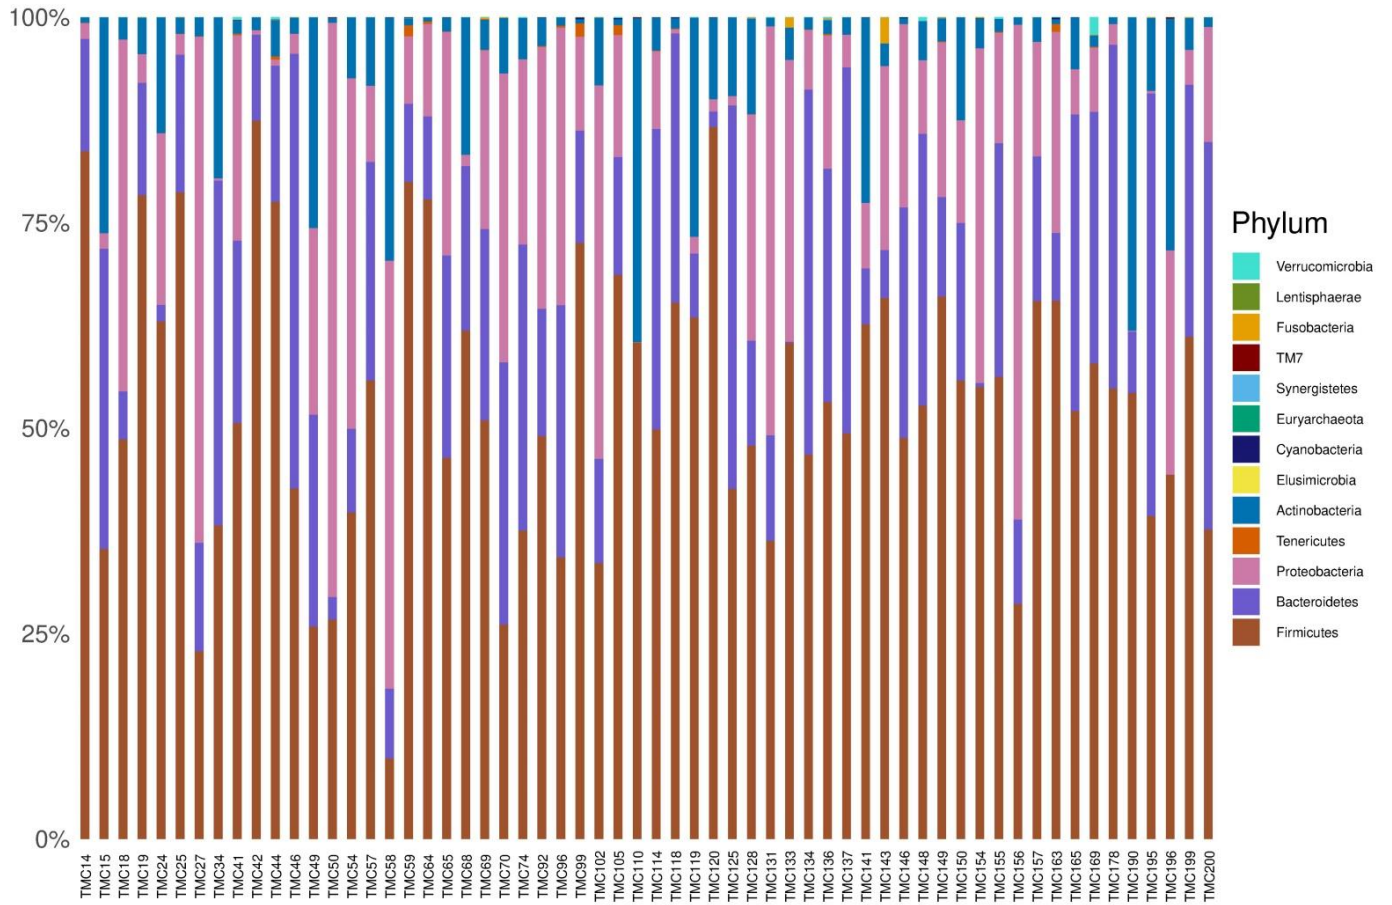

**Figure S6.** Analysis of gut microbiome at the phylum level for each patient. For most patients, Firmicute is the dominant phylum.

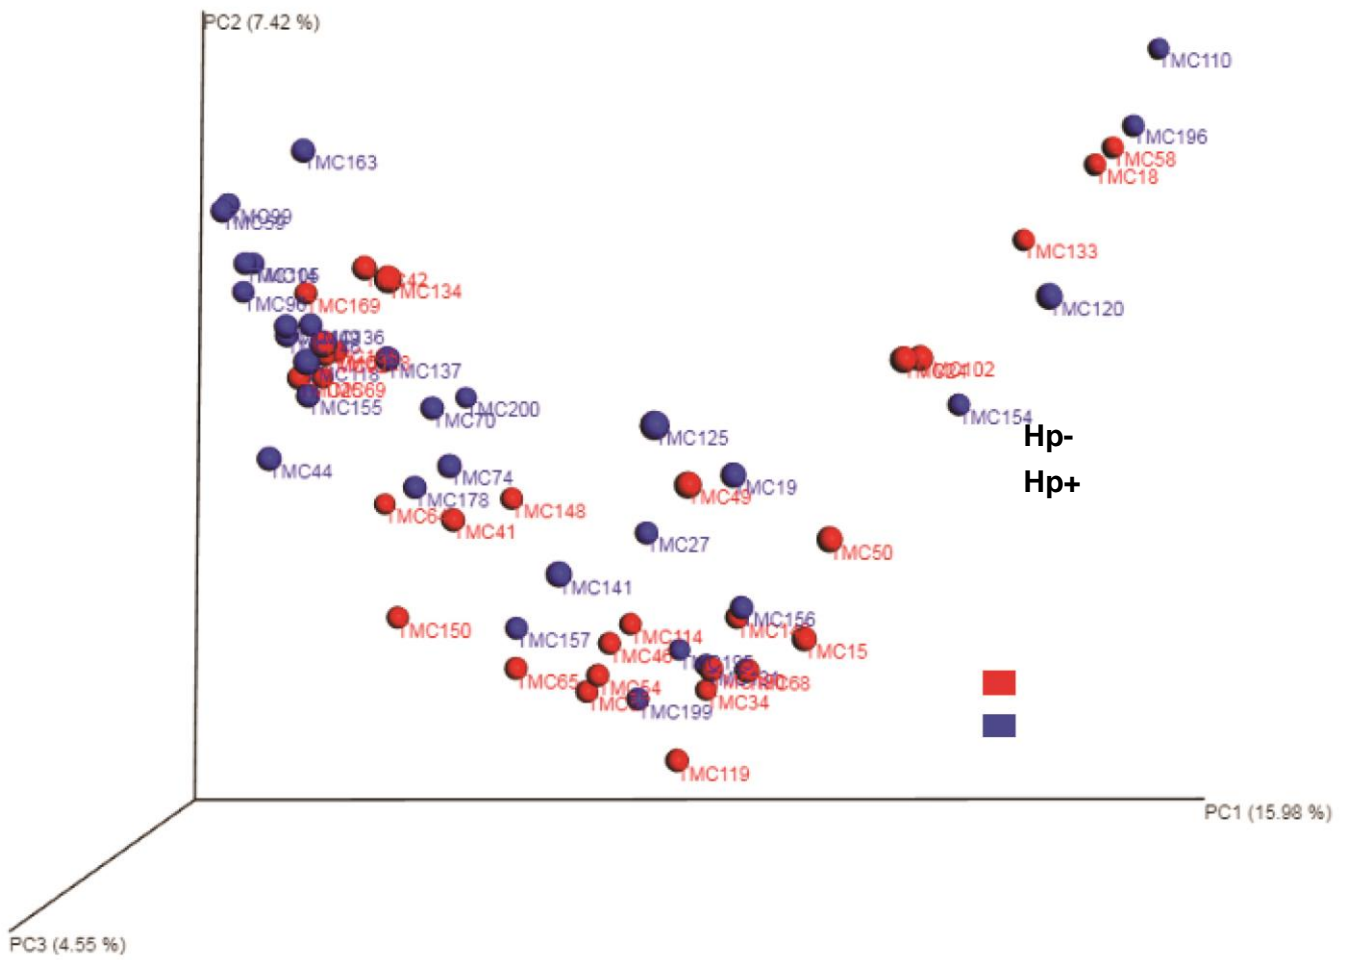

**Figure S7.** Principle coordinates analysis (PCoA) for the *H. pylori*+ (blue) and the *H. pylori*- (red) individuals.

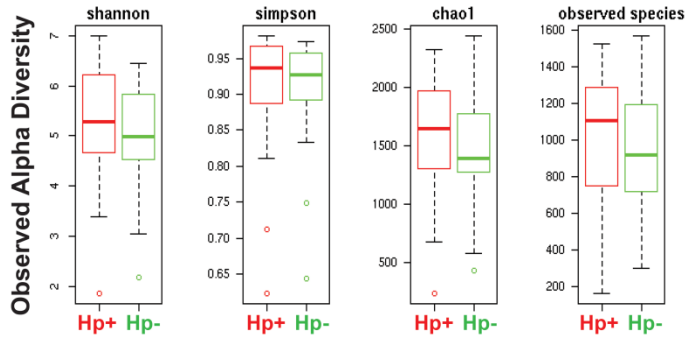

**Figure S8.** Observed  $\alpha$ -diversity measured by Shannon index, Simpson index and Chao1 index analyses and the observed species for the *H. pylori*<sup>+</sup> and the *H. pylori*<sup>-</sup> groups. In each method the *H. pylori*<sup>+</sup> group has more diversity than the *H. pylori*<sup>-</sup> group. The reason for this higher number of microbial species in the feces of the *H. pylori*<sup>+</sup> group is unknown at present. We speculate that it could be linked to the hypochlorhydria caused by destruction of the H<sup>+</sup> ion secreting parietal cells due to chronic *H. pylori* colonization. Thus, it is possible that the microbial species that usually fail to tolerate low gastric pH can pass through the stomach and colonize in intestine because of the hypochlorhydric milieu in stomach created by *H. pylori* infection.

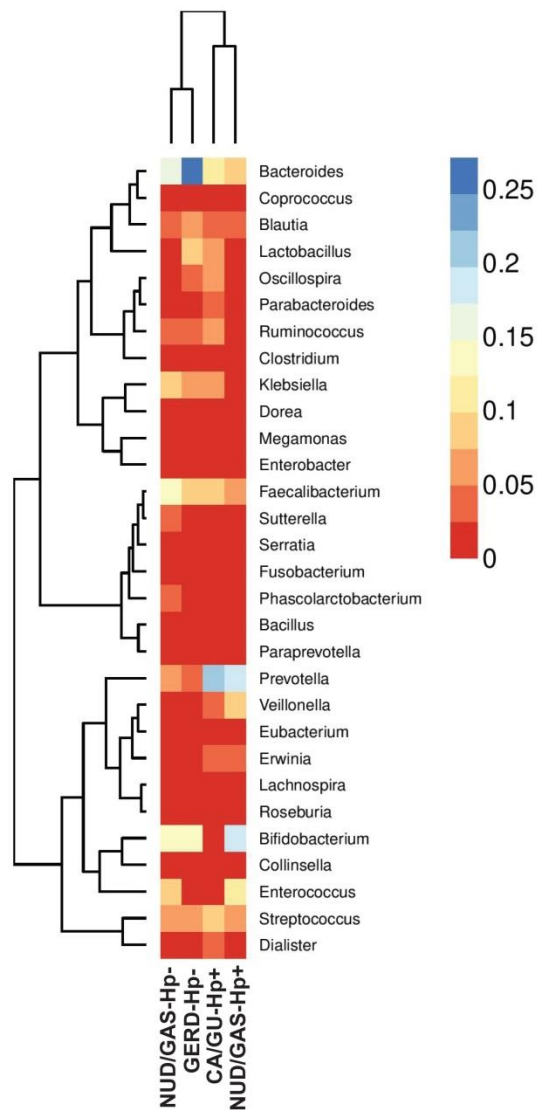

**Figure S9.** Heat map at the genus level for the CA/GU-Hp+, NUD/GAS-Hp+, NUD/GAS-Hp- and GERD-Hp- groups. The genus *Bifidobacterium* is remarkably low particularly in CA/GU-Hp+ group.



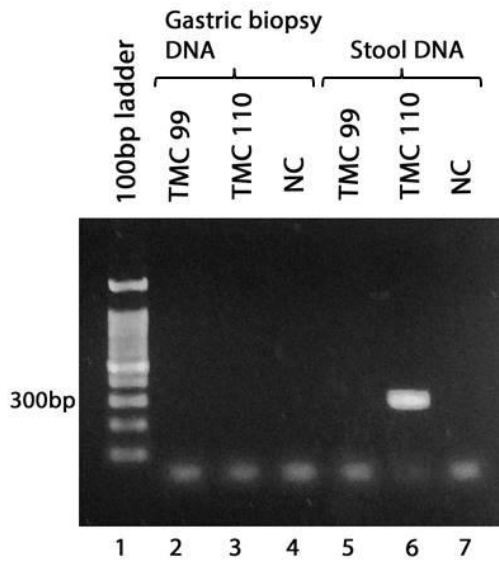

**Figure S10.** Gel image of *B. breve* specific PCR with gastric biopsy metagenomic DNA and stool metagenomic DNA. No amplification was observed with the gastric biopsy metagenomic DNA, while stool metagenomic DNA from TMC110 gave amplicon at 288 bp.

### *B. breve* qPCR with stool metagenomic DNA

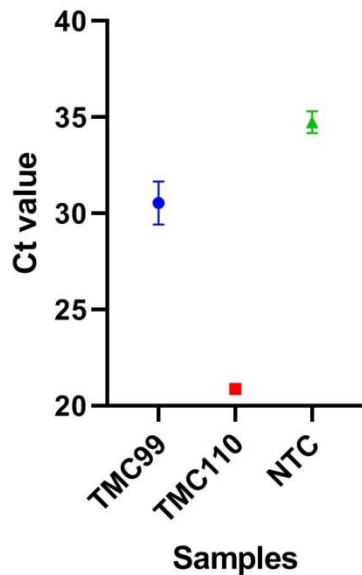

**Figure S11.** Graph showing the mean Ct values obtained by *B. breve* qPCR with stool metagenomic DNA from TMC99 (CA/GU) and TMC110 (NUD/GAS). Higher Ct value in TMC99 indicates lower *B. breve* abundance when compared to TMC99. Error bar indicate the standard deviations.

**Supplementary Tables.**

**Table S1.** Combined data for *ureB* PCR and *H. pylori* culture for all patients.

| <b>Total No. of samples</b> | <b><i>H. pylori ureB</i> positive</b> | <b><i>H. pylori</i> Culture positive</b> | <b>Only <i>ureB</i> positive</b> | <b>Only culture Positive</b> | <b><i>ureB</i> &amp; Culture positive</b> | <b>Total No. of <i>H. pylori</i> positive<br/>(Culture &amp; <i>ureB</i> PCR combined)</b> |
|-----------------------------|---------------------------------------|------------------------------------------|----------------------------------|------------------------------|-------------------------------------------|--------------------------------------------------------------------------------------------|
| <b>375</b>                  | <b>77</b>                             | <b>42</b>                                | <b>41</b>                        | <b>6</b>                     | <b>36</b>                                 | <b>83</b>                                                                                  |

**Table S2.** The *ureB* PCR result and the culture result for each *H. pylori*+ patient.

| <b>S.NO</b> | <b>Sample No.</b> | <b><i>H. pylori ureB</i> pcr +ve</b> | <b><i>H. pylori</i> Culture +ve</b> |
|-------------|-------------------|--------------------------------------|-------------------------------------|
| 1           | TMC 5             | Positive                             | Positive                            |
| 2           | TMC 7             | Positive                             | Positive                            |
| 3           | TMC 11            | Positive                             | Negative                            |
| 4           | TMC 14            | Positive                             | Negative                            |
| 5           | TMC 19            | Positive                             | Positive                            |
| 6           | TMC 20            | Positive                             | Positive                            |
| 7           | TMC 27            | Positive                             | Positive                            |
| 8           | TMC 40            | Positive                             | Positive                            |
| 9           | TMC 44            | Positive                             | Positive                            |
| 10          | TMC 55            | Positive                             | Negative                            |
| 11          | TMC 59            | Positive                             | Positive                            |
| 12          | TMC 66            | Positive                             | Negative                            |
| 13          | TMC 70            | Negative                             | Positive                            |
| 14          | TMC 74            | Positive                             | Positive                            |
| 15          | TMC 88            | Negative                             | Positive                            |
| 16          | TMC 94            | Positive                             | Positive                            |
| 17          | TMC 96            | Positive                             | Positive                            |
| 18          | TMC 99            | Positive                             | Positive                            |
| 19          | TMC 105           | Positive                             | Negative                            |
| 20          | TMC 108           | Positive                             | Negative                            |

|    |         |          |          |
|----|---------|----------|----------|
| 21 | TMC 110 | Negative | Positive |
| 22 | TMC 113 | Positive | Negative |
| 23 | TMC 118 | Positive | Positive |
| 24 | TMC 120 | Positive | Positive |
| 25 | TMC 123 | Positive | Negative |
| 26 | TMC 125 | Positive | Positive |
| 27 | TMC 130 | Positive | Negative |
| 28 | TMC 131 | Positive | Negative |
| 29 | TMC 136 | Positive | Positive |
| 30 | TMC 137 | Positive | Negative |
| 31 | TMC 141 | Positive | Positive |
| 32 | TMC 149 | Positive | Positive |
| 33 | TMC 154 | Positive | Positive |
| 34 | TMC 155 | Positive | Positive |
| 35 | TMC 156 | Positive | Negative |
| 36 | TMC 157 | Positive | Negative |
| 37 | TMC 163 | Positive | Positive |
| 38 | TMC 168 | Positive | Positive |
| 39 | TMC 175 | Positive | Negative |
| 40 | TMC 177 | Positive | Negative |
| 41 | TMC 178 | Positive | Negative |
| 42 | TMC 193 | Positive | Negative |
| 43 | TMC 195 | Positive | Negative |
| 44 | TMC 196 | Positive | Negative |
| 45 | TMC 199 | Negative | Positive |
| 46 | TMC 200 | Positive | Negative |
| 47 | TMC 201 | Positive | Negative |
| 48 | TMC 202 | Positive | Negative |
| 49 | TMC 203 | Positive | Negative |
| 50 | TMC 204 | Positive | Negative |
| 51 | TMC 205 | Positive | Negative |
| 52 | TMC 206 | Positive | Positive |
| 53 | TMC 207 | Positive | Negative |
| 54 | TMC 208 | Positive | Negative |
| 55 | TMC 209 | Positive | Negative |
| 56 | TMC 214 | Positive | Negative |
| 57 | TMC 215 | Positive | Positive |
| 58 | TMC 217 | Positive | Negative |
| 59 | TMC 218 | Positive | Negative |
| 60 | TMC 230 | Positive | Positive |
| 61 | TMC 234 | Positive | Positive |
| 62 | TMC 235 | Positive | Positive |

|    |         |          |          |
|----|---------|----------|----------|
| 63 | TMC 244 | Positive | Negative |
| 64 | TMC 251 | Positive | Negative |
| 65 | TMC 255 | Positive | Negative |
| 66 | TMC 259 | Positive | Negative |
| 67 | TMC 263 | Positive | Positive |
| 68 | TMC 266 | Positive | Negative |
| 69 | TMC 268 | Positive | Positive |
| 70 | TMC 269 | Positive | Positive |
| 71 | TMC 275 | Positive | Positive |
| 72 | TMC 280 | Positive | Positive |
| 73 | TMC 281 | Positive | Negative |
| 72 | TMC 290 | Positive | Positive |
| 75 | TMC 294 | Positive | Positive |
| 76 | TMC 321 | Negative | Positive |
| 77 | TMC 346 | Positive | Negative |
| 78 | TMC 347 | Positive | Negative |
| 79 | TMC 348 | Positive | Negative |
| 80 | TMC 366 | Positive | Positive |
| 81 | TMC 367 | Negative | Positive |
| 82 | TMC 371 | Positive | Positive |
| 83 | TMC 372 | Positive | Negative |

**Table S3.** Nucleotide sequences of the primers used in the study.

| <b>Target</b>                                   | <b>Primer name</b> | <b>Sequence (5'-3')</b>    |
|-------------------------------------------------|--------------------|----------------------------|
| <i>H. pylori vacAs1/s2</i> for multiplex PCR    | VA1-F              | ATGGAAATAC AACAAACACAC     |
|                                                 | VA1-R              | CTGCTTGAATGCGCCAAAC        |
| <i>H. pylori vacAm1/m2</i> for multiplex PCR    | VAG-F              | CAATCTGTCCAATCAAGCGAG      |
|                                                 | VAG-R              | GCGTCAAATAATTCCAAGG        |
| <i>H. pylori cagA</i> for multiplex PCR         | cag5c-F            | GTTGATAACGCTGTTCGCTTC      |
|                                                 | cag3c-R            | GGGTTGTATGATATTTTCCATAA    |
| <i>H. pylori cag-empty site</i>                 | Luni1              | ACATTTTGGCTAAATAAACGCTG    |
|                                                 | R5280              | GGTTGCACGCATTTTCCCTTAATC   |
| <i>H. pylori urease B subunit</i>               | ureB-F             | CGTCCGGCAATAGCTGCCATAGT    |
|                                                 | ureB-R             | GTAGGTCCTGCTACTGAAGCCTTA   |
| <i>H. pylori vacA mid-region</i> for sequencing | VAm-F              | GCTCATTACGGCTTCCACTAATGT   |
|                                                 | VAm-R              | GCGGTTATTGTTGTTATAAAGGGCTA |
| <i>H. pylori cagA 5' end</i> for sequencing     | cagA5              | GGCAATGGTGGTCCTGGAGCTAGGC  |
|                                                 | cagA2              | GGAAATCTTTAATCTCAGTTCGG    |
| <i>H. pylori cagA 3' end</i> for sequencing     | CAG1               | ACCCTAGTCGGTAATGGGTTA      |
|                                                 | CAG2               | GTAATTGTCTAGTTTCGC         |

|                                                        |                    |                                                             |
|--------------------------------------------------------|--------------------|-------------------------------------------------------------|
| ng                                                     |                    |                                                             |
| <i>H. pylori</i><br><i>vacAi</i>                       | VacF1              | GTTGGGATTGGGGGAATGCCG                                       |
|                                                        | C1R                | TTAATTTAACGCTGTTTGAAG                                       |
|                                                        | C2R                | GATCAACGCTCTGATTTGA                                         |
| <i>B. breve</i>                                        | BiBR<br>E-1        | CCGGATGCTCCATCACAC                                          |
|                                                        | BiBR<br>E-2        | ACAAAGTGCCTTGCTCCCT                                         |
| V3-V4<br>region of<br>bacterial<br>16S<br>rRNA<br>gene | 16S<br>V3-<br>V4 F | TCGTCGGCAGCGTCAGATGTGTATAAGAGACAGCCTACGGGNGGC<br>WGCAG      |
|                                                        | 16S<br>V3-<br>V4 R | GTCTCGTGGGCTCGGAGATGTGTATAAGAGACAGGACTACHVGGGT<br>ATCTAATCC |

**Table S4.** The incidence of different upper GI diseases in Kerala and Sikkim.

| <b>Clinical Status</b>                        | <b>Total number</b> | <b>Percentage of total incidence of upper GI diseases in our study</b> | <b>Percentage of total incidence of upper GI diseases in Sikkim</b> |
|-----------------------------------------------|---------------------|------------------------------------------------------------------------|---------------------------------------------------------------------|
| <b>Gastric cancer (CA)*</b>                   | 23                  | 6.1%                                                                   | 1.2%                                                                |
| <b>Gastric ulcer (GU)*</b>                    | 22                  | 5.9%                                                                   | 1.4%                                                                |
| <b>Duodenal ulcer (DU)*</b>                   | 6                   | 1.6%                                                                   | 4.4%                                                                |
| <b>Gastritis (GAS)</b>                        | 135                 | 36%                                                                    | 51.07%                                                              |
| <b>Non-ulcer dyspepsia (NUD)</b>              | 97                  | 25.9%                                                                  | 17%                                                                 |
| <b>Gastroesophageal reflux disease (GERD)</b> | 92                  | 24.5%                                                                  | 11.5%                                                               |

**Footnote:** The severe gastric diseases like gastric cancer or peptic ulcer (gastric and duodenal ulcers) are shown with \*.

**Table S5.** Genotypes of *H. pylori* strains isolated from Trivandrum

| <i>H. pylori</i> Genotype | Number of Strains(n=42) | % of strains |
|---------------------------|-------------------------|--------------|
| <i>vacAs1</i>             | 39                      | 92.9         |
| <i>vacAs2</i>             | 3                       | 7.1          |
| <i>vacAm1</i>             | 32                      | 76.2         |
| <i>vacAm2</i>             | 10                      | 23.8         |
| <i>vacAi1</i>             | 37                      | 88.1         |
| <i>vacAi2</i>             | 5                       | 11.9         |
| <i>cagA(+)</i>            | 38                      | 90.5         |
| <i>cagA(-)</i>            | 4                       | 9.5          |
| <i>cag-PAI(-)</i>         | 4                       | 9.5          |
| <i>vacAs1i1m1cagA(+)</i>  | 31                      | 73.8         |
| <i>vacAs1i1m2cagA(+)</i>  | 5                       | 11.9         |
| <i>vacAs1i2m2cagA(+)</i>  | 2                       | 4.8          |
| <i>vacAs2i2m2cagA(-)</i>  | 3                       | 7.1          |
| <i>vacAs1i1m1cagA(-)</i>  | 1                       | 2.4          |



**Table S6.** The CagA C-terminal end variants and their association with different clinical status.

| CagA types         | PUD (GU +DU) |             | Gastric cancer |             | Gastritis |             | NUD      |             | GERD     |             |
|--------------------|--------------|-------------|----------------|-------------|-----------|-------------|----------|-------------|----------|-------------|
|                    | N            | %           | N              | %           | N         | %           | N        | %           | N        | %           |
| <b>A B-C (28)</b>  | <b>3</b>     | <b>10.7</b> | <b>3</b>       | <b>10.7</b> | <b>11</b> | <b>39.3</b> | <b>6</b> | <b>21.4</b> | <b>5</b> | <b>17.9</b> |
| <b>A B-C-C (7)</b> |              |             |                |             | <b>5</b>  | <b>71.4</b> | <b>1</b> | <b>14.3</b> | <b>1</b> | <b>14.3</b> |
| <b>A B (2)</b>     |              |             |                |             | <b>1</b>  | <b>50</b>   | <b>1</b> | <b>50</b>   |          |             |
| <b>A-C-C (1)</b>   |              |             |                |             |           |             | <b>1</b> | <b>100</b>  |          |             |

**Table S7.** *H. pylori* genotypes and clinical status.

| <i>H. pylori</i> genotypes | CA/PUD<br>(N=6) | NUD/GAS<br>(N=29) | GERD<br>(N=7) |
|----------------------------|-----------------|-------------------|---------------|
| <i>vacAs1i1m1cagA</i> (+)  | 3 (50%)         | 23 (79.3%)        | 5 (71.4%)     |
| <i>vacAs1i1m2cagA</i> (+)  | 1 (16.7%)       | 3 (10.3%)         | 1 (14.3%)     |
| <i>vacAs1i2m2cagA</i> (+)  | 2 (33.3%)       |                   |               |
| <i>vacAs2i2m2cagA</i> (-)  |                 | 2 (7%)            | 1<br>(14.3%)  |
| <i>vacAs1i1m1cagA</i> (-)  |                 | 1 (3.4%)          |               |

**Table S8.** Details of the 60 patients (30 *H. pylori*+ and 30 *H. pylori*-) included in gut microbiome analysis.

| <i>H. pylori</i> + | 30   | <i>H. pylori</i> - | 30   |
|--------------------|------|--------------------|------|
| Number of Male     | 14   | Number of Male     | 14   |
| Number of Female   | 16   | Number of Female   | 16   |
| Ave Age            | 50.5 | Ave Age            | 50.4 |

**Table S9.** The gut microbial diversity for each *H. pylori*+ patients vs the *H. pylori*- patients.

|            |            |
|------------|------------|
| <b>Hp+</b> | <b>Hp-</b> |
|------------|------------|

| Sample No. | Age range (years) | Shannon | Simpson | Chao1  | Observed OTU | Sample No. | Age range (years) | Shannon | Simpson | Chao1  | Observed OTU |
|------------|-------------------|---------|---------|--------|--------------|------------|-------------------|---------|---------|--------|--------------|
| TMC 14     | 60-65             | 156886  | 90651   | 70773  | 1508         | TMC 54     | 60-65             | 179814  | 136796  | 127716 | 896          |
| TMC 19     | 45-50             | 67092   | 39655   | 38257  | 642          | TMC 134    | 45-50             | 144923  | 98742   | 95625  | 937          |
| TMC 27     | 42-47             | 142615  | 103431  | 97622  | 877          | TMC 15     | 42-47             | 135463  | 85220   | 82632  | 669          |
| TMC 44     | 50-55             | 177433  | 111079  | 103770 | 1389         | TMC 119    | 50-55             | 130451  | 90034   | 87867  | 847          |
| TMC 59     | 40-45             | 177433  | 111079  | 103770 | 1249         | TMC 148    | 40-45             | 304907  | 191067  | 185366 | 1219         |
| TMC 70     | 37-42             | 274865  | 194727  | 178565 | 1153         | TMC 25     | 37-42             | 115287  | 81595   | 77844  | 1196         |
| TMC 74     | 58-63             | 169567  | 113453  | 107825 | 1014         | TMC 34     | 58-63             | 226229  | 142514  | 133470 | 909          |
| TMC96      | 47-53             | 274481  | 199154  | 181589 | 1357         | TMC 133    | 47-53             | 157202  | 111505  | 106505 | 526          |
| TMC 99     | 40-45             | 214944  | 134907  | 122870 | 1524         | TMC 128    | 40-45             | 90688   | 41669   | 40459  | 367          |
| TMC 105    | 48-53             | 105253  | 75109   | 67132  | 1319         | TMC 69     | 48-53             | 207598  | 138245  | 127521 | 1568         |
| TMC 110    | 40-45             | 126278  | 80305   | 76850  | 163          | TMC 114    | 40-45             | 205644  | 137189  | 132542 | 1120         |
| TMC 118    | 37-43             | 187981  | 113335  | 109469 | 1180         | TMC 68     | 37-43             | 155775  | 101596  | 97717  | 852          |
| TMC 120    | 43-48             | 90688   | 41669   | 40459  | 367          | TMC 42     | 43-48             | 142935  | 89869   | 87385  | 852          |
| TMC 125    | 62-67             | 99034   | 63517   | 61923  | 708          | TMC 46     | 62-67             | 125313  | 74374   | 70715  | 877          |
| TMC 131    | 42-47             | 158425  | 104898  | 100753 | 753          | TMC 41     | 42-47             | 190599  | 129248  | 125204 | 1202         |
| TMC 136    | 65-70             | 143676  | 90727   | 85838  | 1229         | TMC 18     | 65-70             | 118265  | 77099   | 73267  | 297          |
| TMC 137    | 55-60             | 191513  | 105505  | 98498  | 1040         | TMC 150    | 55-60             | 330326  | 228543  | 219723 | 1367         |
| TMC 141    | 37-42             | 230459  | 154378  | 151638 | 1032         | TMC 58     | 37-42             | 135164  | 95478   | 92874  | 342          |
| TMC 146    | 62-67             | 218884  | 153045  | 143737 | 1304         | TMC 169    | 62-67             | 96071   | 65014   | 62274  | 984          |
| TMC 149    | 30-35             | 162523  | 100999  | 96005  | 1346         | TMC 49     | 30-35             | 112148  | 65775   | 61745  | 705          |
| TMC 154    | 45-50             | 149888  | 95679   | 90262  | 584          | TMC 24     | 45-50             | 68500   | 39969   | 38847  | 546          |
| TMC 155    | 32-37             | 318019  | 211074  | 197213 | 1222         | TMC 102    | 32-37             | 97953   | 60182   | 58757  | 599          |
| TMC 156    | 50-55             | 170135  | 125055  | 118496 | 745          | TMC 65     | 50-55             | 239837  | 174250  | 164726 | 1170         |
| TMC 157    | 43-48             | 205892  | 148491  | 144984 | 1291         | TMC 57     | 43-48             | 137899  | 98346   | 91520  | 989          |
| TMC 163    | 65-70             | 105916  | 61067   | 57805  | 1035         | TMC 92     | 65-70             | 220830  | 150421  | 145833 | 1284         |
| TMC 178    | 60-65             | 205219  | 142948  | 131838 | 1189         | TMC 50     | 60-65             | 147439  | 100604  | 98351  | 717          |

|         |       |         |         |         |       |         |       |         |         |         |       |
|---------|-------|---------|---------|---------|-------|---------|-------|---------|---------|---------|-------|
| TMC 195 | 65-70 | 182027  | 123675  | 114366  | 857   | TMC 143 | 65-70 | 353175  | 245998  | 226663  | 936   |
| TMC 196 | 42-47 | 261328  | 177387  | 169514  | 461   | TMC 190 | 42-47 | 209931  | 143424  | 134883  | 792   |
| TMC 199 | 50-55 | 151610  | 96902   | 90876   | 1144  | TMC 165 | 50-55 | 126044  | 83400   | 77656   | 958   |
| TMC 200 | 42-47 | 118088  | 76502   | 68590   | 1075  | TMC 64  | 42-47 | 155775  | 101596  | 97717   | 852   |
| Total   |       | 5238152 | 3440403 | 3221287 | 30757 | Total   |       | 5062185 | 3379762 | 3223404 | 26575 |

**Table S10.** Metadata of the patients included in the 16S rRNA gene sequence analysis among 4 groups- CA/GU-Hp+, NUD/GAS-Hp+, NUD/GAS-Hp-, GERD-Hp-.

| <b>Group name</b>       | <b>Sample ID</b> | <b>Clinical status</b> | <b>Age range (years)</b> | <b>Hp+/Hp-</b> |
|-------------------------|------------------|------------------------|--------------------------|----------------|
| CA(Hp+)/GU(Hp+)         | TMC14            | Gastric cancer         | 62-67                    | Hp+            |
|                         | TMC99            | Gastric cancer         | 40-45                    | Hp+            |
|                         | TMC178           | Gastric cancer         | 62-67                    | Hp+            |
|                         | TMC200           | Gastric cancer         | 45-50                    | Hp+            |
|                         | TMC146           | Gastric ulcer          | 60-65                    | Hp+            |
|                         | TMC154           | Gastric cancer         | 42-47                    | Hp+            |
|                         | TMC163           | Gastric ulcer          | 65-70                    | Hp+            |
| NUD(Hp+)/Gastritis(Hp+) | TMC125           | NUD                    | 62-67                    | Hp+            |
|                         | TMC110           | NUD                    | 40-45                    | Hp+            |
|                         | TMC199           | Gastritis              | 50-55                    | Hp+            |
|                         | TMC19            | NUD                    | 45-50                    | Hp+            |
|                         | TMC74            | NUD                    | 60-65                    | Hp+            |
|                         | TMC196           | Gastritis              | 42-47                    | Hp+            |
|                         | TMC137           | NUD                    | 55-60                    | Hp+            |
| NUD(Hp-)/Gastritis(Hp-) | TMC54            | Gastritis              | 60-65                    | Hp-            |
|                         | TMC128           | NUD                    | 40-45                    | Hp-            |
|                         | TMC92            | Gastritis              | 65-70                    | Hp-            |
|                         | TMC143           | Gastritis              | 62-67                    | Hp-            |
|                         | TMC58            | NUD                    | 37-42                    | Hp-            |
|                         | TMC18            | NUD                    | 65-70                    | Hp-            |
|                         | TMC65            | Gastritis              | 50-55                    | Hp-            |
| GERD(Hp-)               | TMC34            | GERD                   | 60-65                    | Hp-            |
|                         | TMC41            | GERD                   | 40-45                    | Hp-            |
|                         | TMC24            | GERD                   | 47-53                    | Hp-            |
|                         | TMC69            | GERD                   | 47-53                    | Hp-            |
|                         | TMC57            | GERD                   | 45-50                    | Hp-            |
|                         | TMC15            | GERD                   | 42-47                    | Hp-            |
|                         | TMC42            | GERD                   | 43-48                    | Hp-            |

**Table S11.** Metadata of the age and sex matched patients (N=6 and 3 pairs) included in the fecal shotgun metagenomic sequencing analysis.

| <b>Pairs</b> | <b>Group name</b>       | <b>Sample ID</b> | <b>Clinical status</b> | <b>Age range (years)</b> | <b>Hp+/Hp-</b> |
|--------------|-------------------------|------------------|------------------------|--------------------------|----------------|
| Pair 1       | CA(Hp+)/GU(Hp+)         | TMC99            | Gastric cancer         | 40-45                    | Hp+            |
|              | NUD(Hp+)/Gastritis(Hp+) | TMC110           | NUD                    | 40-45                    | Hp+            |
| Pair 2       | CA(Hp+)/GU(Hp+)         | TMC163           | Gastric ulcer          | 65-70                    | Hp+            |
|              | NUD(Hp+)/Gastritis(Hp+) | TMC125           | NUD                    | 65-70                    | Hp+            |
| Pair 3       | CA(Hp+)/GU(Hp+)         | TMC154           | Gastric cancer         | 42-47                    | Hp+            |
|              | NUD(Hp+)/Gastritis(Hp+) | TMC120           | NUD                    | 42-47                    | Hp+            |



**Table S12.** The Nanopore read statistics for each sample.

| <b>Read Statistics</b>                | <b>TMC99</b> | <b>TMC110</b> | <b>TMC_163</b> | <b>TMC_125</b> | <b>TMC_154</b> | <b>TMC_120</b> |
|---------------------------------------|--------------|---------------|----------------|----------------|----------------|----------------|
| Reads Generated :                     | 6,69,400     | 1,41,339      | 2,12,156       | 1,57,603       | 1,98,330       | 2,84,964       |
| Maximum Read Length :                 | 16575        | 24116         | 16443          | 18319          | 19332          | 19654          |
| Minimum Read Length :                 | 133          | 87            | 1              | 1              | 1              | 1              |
| Average Read Length :                 | 1339.7       | 1321.1        | 1412.4         | 1506.2         | 1128.2         | 1158.9         |
| Median Read Length :                  | 1633         | 286           | 3407.5         | 218            | 2443           | 1678           |
| Total Read Length :                   | 89,68,17,108 | 18,67,26,069  | 29,96,45,341   | 23,73,78,327   | 22,37,53,693   | 33,02,39,186   |
| Total Number of Non-ATGC Characters : | 0            | 0             | 0              | 0              | 0              | 0              |
| Percentage of Non-ATGC Characters :   | 0            | 0             | 0              | 0              | 0              | 0              |
| Reads >= 100 bp :                     | 6,69,400     | 1,41,336      | 2,10,389       | 1,55,726       | 1,94,039       | 2,80,740       |
| Reads >= 200 bp :                     | 6,67,500     | 1,40,382      | 2,01,646       | 1,44,708       | 1,68,587       | 2,60,463       |
| Reads >= 500 bp :                     | 5,99,414     | 77760         | 1,45,287       | 99245          | 1,06,778       | 1,82,551       |
| Reads >= 1 Kbp :                      | 3,83,236     | 44816         | 99602          | 67585          | 65321          | 1,09,835       |
| Reads >= 10 Kbp :                     | 88           | 1062          | 146            | 673            | 663            | 376            |
| Reads >= 1 Mbp :                      | 0            | 0             | 0              | 0              | 0              | 0              |
| N50 value :                           | 1660         | 2938          | 2408           | 3066           | 2244           | 1872           |

**Table S13.** Abundance of each domain present in each sample as discerned by Nanopore sequencing.

| <b>Domain</b> | <b>TMC110</b> | <b>TMC120</b> | <b>TMC125</b> | <b>TMC154</b> | <b>TMC163</b> | <b>TMC99</b> |
|---------------|---------------|---------------|---------------|---------------|---------------|--------------|
| Bacteria      | 50479         | 51993         | 51855         | 51796         | 51492         | 51044        |
| Archaea       | 0             | 0             | 0             | 0             | 49            | 302          |
| Eukaryota     | 1250          | 70            | 176           | 165           | 196           | 289          |
| Viruses       | 0             | 0             | 0             | 0             | 124           | 81           |

**Table S14.** Mean Ct values for gastric biopsy and stool DNA for TMC99 (CA/GU) and TMC110 (NUD/GAS).

| <b>Template source</b> | Metagenomic Biopsy DNA |        | Metagenomic Stool DNA |        |        |
|------------------------|------------------------|--------|-----------------------|--------|--------|
| <b>Sample</b>          | TMC99                  | TMC110 | TMC99                 | TMC110 | NTC    |
| <b>Mean Ct value</b>   | Undetermined           | 34.189 | 30.378                | 20.893 | 34.736 |

NTC: No-template Control. CA: Gastric cancer; GU: Gastric ulcer; NUD: Non-ulcer dyspepsia; GAS: Gastritis
